# Supplementary material for: Coordination compounds of bis(5-tetrazolyl)amine with manganese(ii), zinc(ii) and cadmium(ii): synthesis, structure and magnetic properties
Source: Royal Society of Chemistry journal article supplement (doi:10.1039/b804996c), 2008-01-01
Supplement: b804996c.pdf [file b804996c.pdf]

## Electronic Supplementary Information

### Coordination compounds of bis(5-tetrazolyl)amine with manganese(II), zinc(II) and Cadmium(II): synthesis, structure and magnetic properties

Na Liu, Qi Yue, Yan-Qing Wang, Ai-Ling Cheng, and En-Qing Gao\*

Table S1 Hydrogen bond lengths (Å) and angles (°) for the complexes 1-3

|          | D-H...A      | <i>d</i> (D-H) | <i>d</i> (H...A) | <i>d</i> (D...A) | <(DHA) | Symmetry codes <sup>a</sup> |
|----------|--------------|----------------|------------------|------------------|--------|-----------------------------|
| <b>1</b> | O3-H3WB...O3 | 0.79(3)        | 2.22(3)          | 2.885(3)         | 141(3) | -x+y, -x+1, z               |
|          | O3-H3WA...N4 | 0.84(3)        | 1.90(3)          | 2.717(3)         | 165(3) | y, -x+y+1, -z+1             |
|          | N5-H5N...N8  | 0.799(15)      | 2.126(15)        | 2.914(3)         | 169(2) | -y+2, x-y+1, z              |
|          | O2-H2WB...N7 | 0.72(3)        | 2.14(3)          | 2.796(3)         | 153(3) | x-y+1,-y+2,-z+1/2           |
|          | O2-H2WA...N3 | 0.83(3)        | 1.97(3)          | 2.788(3)         | 174(3) | -x+1,-x+y+1,-z+1/2          |
| <b>2</b> | O3-H3WB...O3 | 0.76(4)        | 2.36(4)          | 2.896(4)         | 128(4) | -x+y, -x+1, z               |
|          | O3-H3WA...N4 | 0.82(4)        | 1.98(4)          | 2.766(4)         | 160(4) | y, -x+y+1, -z+1             |
|          | N5-H5N...N8  | 0.831(18)      | 2.163(19)        | 2.988(3)         | 172(3) | -y+2, x-y+1, z              |
|          | O2-H2WB...N7 | 0.83(4)        | 1.94(4)          | 2.768(3)         | 171(3) | x-y+1,-y+2,-z+1/2           |
|          | O2-H2WA...N3 | 0.74(4)        | 2.07(4)          | 2.786(3)         | 163(4) | -x+1,-x+y+1,-z+1/2          |
| <b>3</b> | O3-H3WB...O3 | 0.73(4)        | 2.33(3)          | 2.926(3)         | 140(3) | -x+y, -x+1, z               |
|          | O3-H3WA...N4 | 0.80(3)        | 1.95(3)          | 2.730(2)         | 163(3) | y, -x+y+1, -z+1             |
|          | N5-H5N...N8  | 0.83(2)        | 2.11(2)          | 2.9186(19)       | 165(2) | -y+2, x-y+1, z              |
|          | O2-H2WB...N7 | 0.84(3)        | 1.97(3)          | 2.7993(19)       | 169(2) | x-y+1,-y+2,-z+1/2           |
|          | O2-H2WA...N3 | 0.83(3)        | 2.02(3)          | 2.819(2)         | 162(3) | -x+1,-x+y+1,-z+1/2          |

**Table S2 Hydrogen bond lengths (Å) and angles (°) for the complex 4**

| D-H...A       | <i>d</i> (D-H) | <i>d</i> (H...A) | <i>d</i> (D...A) | <(DHA)    | Symmetry codes <sup>a</sup> |
|---------------|----------------|------------------|------------------|-----------|-----------------------------|
| N5-H5...N7    | 0.84(2)        | 1.97(2)          | 2.8126(19)       | 172.2(19) | x+1/2, -y+3/2, -z           |
| N14-H14...N12 | 0.75(2)        | 2.33(2)          | 3.080(2)         | 178(2)    | x+1/2, -y+1/2, -z+1         |
| O1-H1WB...N13 | 0.73(3)        | 2.12(3)          | 2.845(2)         | 172(3)    | -x+1/2, y+1/2, -z+1         |
| O1-H1WA...N11 | 0.88(3)        | 1.91(3)          | 2.762(2)         | 163(3)    | -x, -y+1, z                 |
| O2-H2WB...O7  | 0.88(3)        | 1.91(3)          | 2.7726(18)       | 169(3)    |                             |
| O2-H2WA...O5  | 0.86(3)        | 2.23(3)          | 3.084(2)         | 171(3)    | -x, -y+1, z                 |
| O3-H3WB...N13 | 0.78(3)        | 2.19(3)          | 2.934(2)         | 159(3)    | -x+1/2, y+1/2, -z           |
| O3-H3WA...N18 | 0.96(3)        | 1.78(3)          | 2.7253(19)       | 170(3)    | -x+1, -y+1, z-1             |
| O4-H4WB...O8  | 0.86(2)        | 1.94(2)          | 2.7989(19)       | 174(2)    | x-1, y, z                   |
| O4-H4WA...O3  | 0.78(3)        | 2.17(3)          | 2.946(2)         | 177(3)    | -x, -y+1, z+1               |
| O5-H5WA...N3  | 0.91(2)        | 1.79(2)          | 2.6947(19)       | 168(2)    |                             |
| O5-H5WB...N4  | 0.80(3)        | 2.25(3)          | 3.035(2)         | 166(3)    | -x+1, -y+1, z               |
| O6-H6WB...N4  | 0.91(3)        | 2.12(3)          | 2.987(2)         | 159(3)    | -x+1, -y+1, z+1             |
| O6-H6WA...N8  | 0.82(3)        | 2.02(3)          | 2.834(2)         | 175(3)    | -x+1/2, y-1/2, -z+1         |
| O7-H7WB...N17 | 0.79(2)        | 2.21(2)          | 2.9894(18)       | 169(2)    | -x+1, -y+1, z-1             |
| O8-H8WA...N2  | 0.78(2)        | 2.23(2)          | 2.9998(19)       | 173(3)    | <b>-x+1, -y+1, z</b>        |

**Table S3 Hydrogen bond lengths (Å) and angles (°) for the complexes 5 and 6**

|          | D-H...A        | <i>d</i> (D-H) | <i>d</i> (H...A) | <i>d</i> (D...A) | <(DHA)  | Symmetry codes <sup>b</sup> |
|----------|----------------|----------------|------------------|------------------|---------|-----------------------------|
| <b>5</b> | N5-H5A...N2    | 0.86           | 1.99             | 2.842(8)         | 170.6   | x+1/2, -y+3/2, -z           |
|          | N14-H14A...N17 | 0.86           | 2.04             | 2.897(8)         | 176.7   | x-1/2, -y+3/2, -z-1         |
|          | N19-H19A...N8  | 0.89           | 2.32             | 3.071(7)         | 141.4   | -x+3/2, y-1/2, z-1          |
|          | N20-H20C...N13 | 0.89           | 2.29             | 3.037(7)         | 141.7   | x+1/2, -y+3/2, -z           |
|          | O1-H1W...N7    | 0.85(2)        | 2.17(7)          | 2.913(8)         | 145(12) |                             |
|          | O2-H2W...N12   | 0.85(2)        | 2.23(11)         | 2.908(8)         | 137(14) |                             |
| <b>6</b> | N4-H4...N8     | 0.95(6)        | 1.86(6)          | 2.802(5)         | 171(5)  | -x+3, y-1/2, -z+1/2         |
|          | N5-H5...O2     | 0.85(5)        | 1.90(5)          | 2.735(5)         | 169(5)  |                             |
|          | O1-H1B...N9    | 0.833(19)      | 2.05(2)          | 2.882(5)         | 172(5)  | x-1, y, z                   |
|          | O1-H1A...N3    | 0.848(19)      | 2.13(2)          | 2.974(5)         | 175(6)  | x, -y+3/2, z+1/2            |
|          | O2-H2B...N7    | 0.819(19)      | 2.15(3)          | 2.828(5)         | 140(4)  | -x+3, y-1/2, -z+1/2         |
|          | O2-H2A...N7    | 0.86(2)        | 2.244(19)        | 2.957(5)         | 141(4)  | -x+3, -y+2, -z+1            |

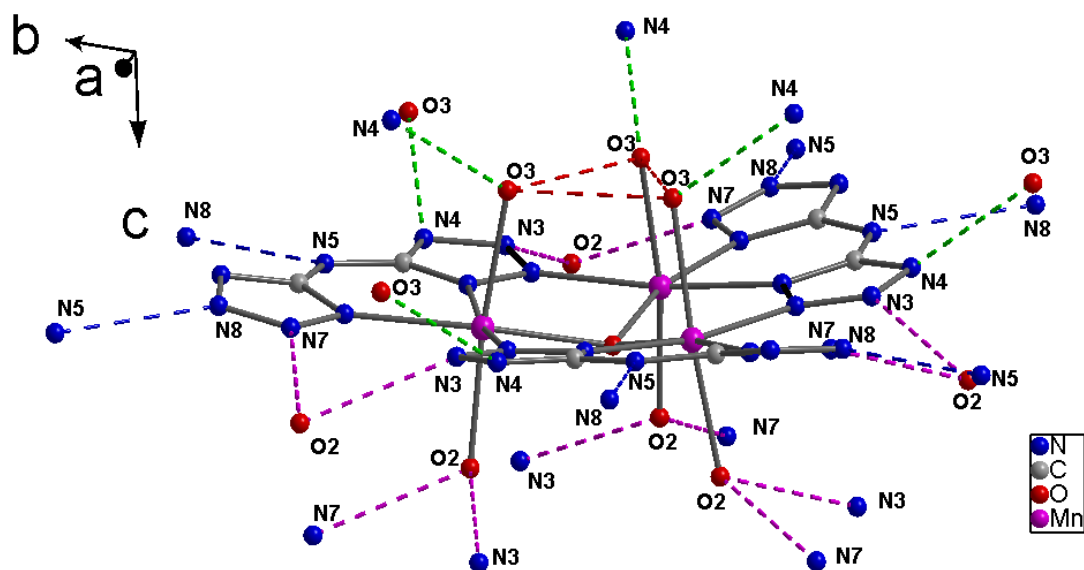

Fig. S1. The hydrogen bonding pattern of a triangular motif in **1**. Different colors are used for the four types of hydrogen bonds (dashed lines): red, O3-H...O3 within the motif; blue, intralayer N5-H...N8; green, intralayer O3-H...N4; purple, interlayer O2-H...N3 and O2-H...N7. See Table S1.

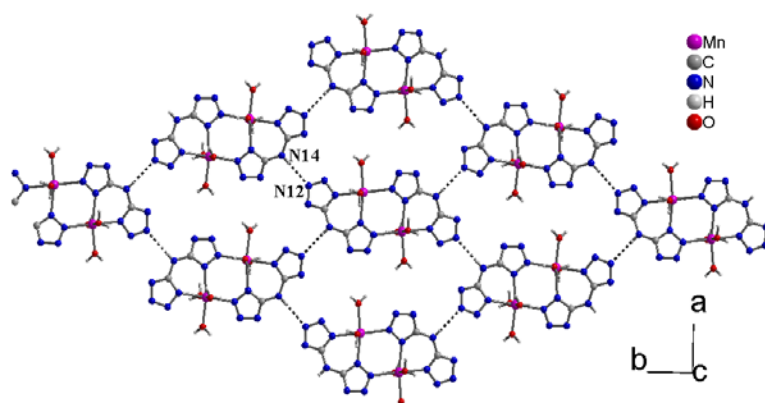

Fig. S2. The self-assembly of the binuclear motifs in **4** via N-H...N hydrogen bonds along the ab plane.

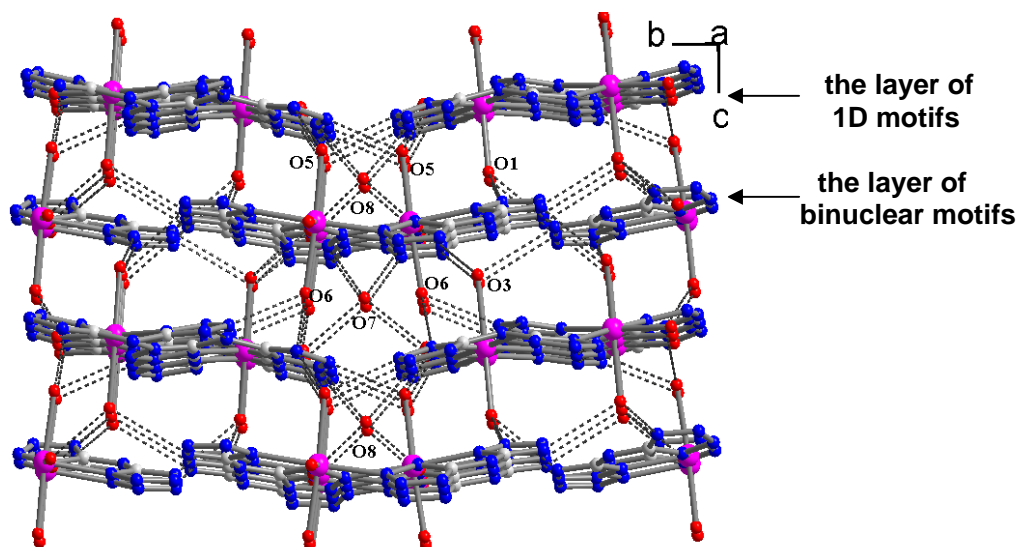

Fig. S3 The packing of the binuclear and 1D motifs in **4** through hydrogen bonds. Hydrogen atoms are omitted for clarity.

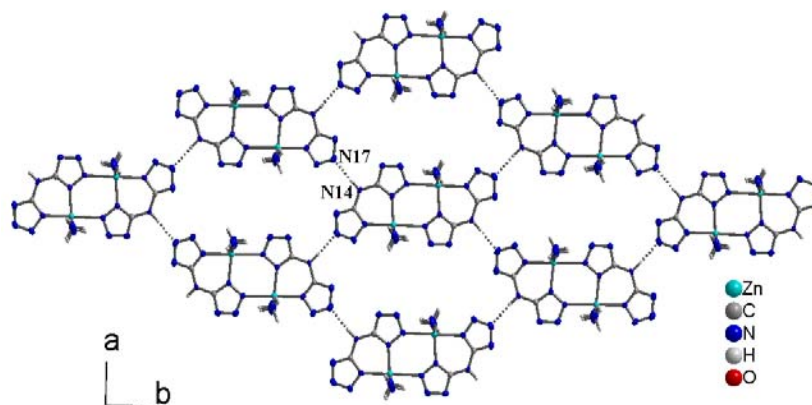

Fig. S4. The self-assembly of the binuclear motifs in **5** via N-H...N hydrogen bonds along the ab plane.

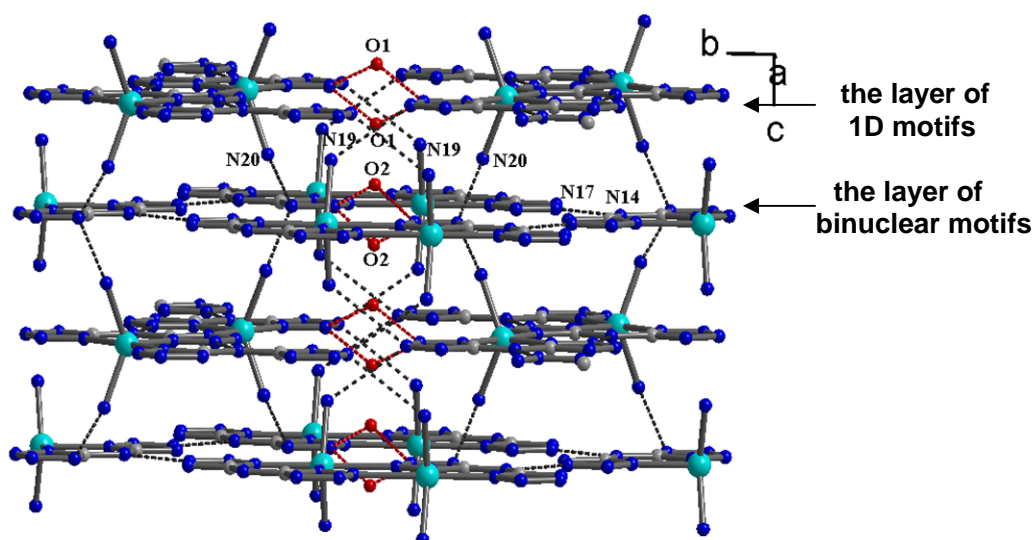

Fig. S5 The packing of the binuclear and 1D motifs in **5** through hydrogen bonds. Hydrogen atoms are omitted for clarity.

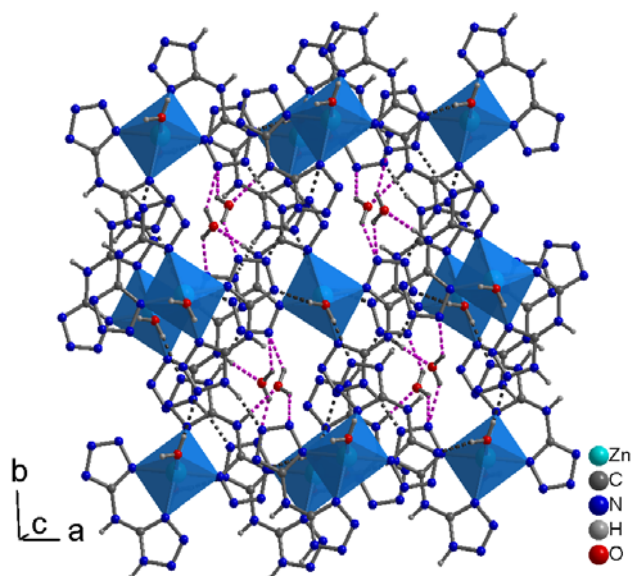

Fig. S6. A view showing the hydrogen bonds of the lattice water molecules in **6**.
